# Supplementary material for: Modelled health benefits of a sugar-sweetened beverage tax across different socioeconomic groups in Australia: A cost-effectiveness and equity analysis
Source: PubMed Central journal article supplement (PMC5486958; doi:10.1371/journal.pmed.1002326), 2017-06-27
Supplement: pmed.1002326.s003.pdf [file pmed.1002326.s003.pdf]

S1 Fig. Deadweight loss of a SSB tax

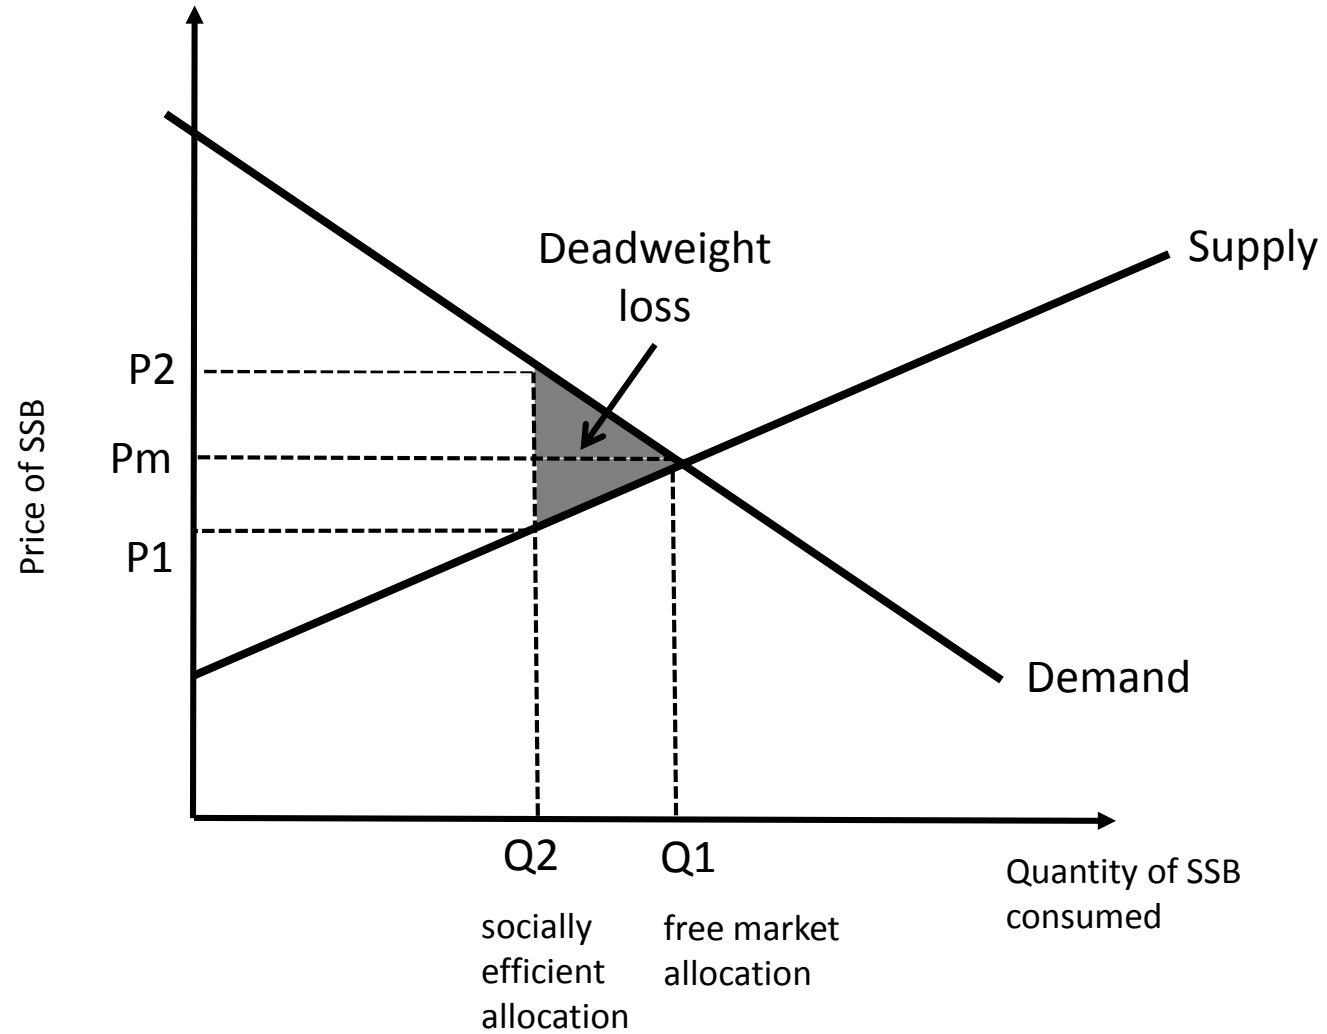

Notes:  $P_m$  = market price prior to tax.  $P_1$  = price sellers receive,  $P_2$  = price after tax,  $Q_1$  = original quantity demanded,  $Q_2$  = quantity demanded after tax.
