# Supplementary material for: Modelled health benefits of a sugar-sweetened beverage tax across different socioeconomic groups in Australia: A cost-effectiveness and equity analysis
Source: PubMed Central journal article supplement (PMC5486958; doi:10.1371/journal.pmed.1002326), 2017-06-27
Supplement: pmed.1002326.s006.pdf [file pmed.1002326.s006.pdf]

S1 Table SSB Intake

| Consumption of SSB                      | Quintile 1 |            | Quintile 2 |            | Quintile 3 |            | Quintile 4 |            | Quintile 5 |            |
|-----------------------------------------|------------|------------|------------|------------|------------|------------|------------|------------|------------|------------|
|                                         | Males 2+   | Females 2+ | Males 2+   | Females 2+ | Males 2+   | Females 2+ | Males 2+   | Females 2+ | Males 2+   | Females 2+ |
| Mean intake carbonated drinks (g/day)   | 145.0      | 96.5       | 143.9      | 74.1       | 125.9      | 73.9       | 128.0      | 71.1       | 110.2      | 51.1       |
| Relative standard error of estimate (%) | 11.7       | 7.2        | 10.5       | 7.2        | 12.1       | 5.8        | 9.6        | 7.4        | 11.0       | 6.0        |
| Lower 95% CI                            | 121.5      | 82.1       | 122.9      | 59.6       | 101.7      | 62.2       | 108.8      | 56.3       | 88.2       | 39.2       |
| Upper 95% CI                            | 168.4      | 111.0      | 164.8      | 88.5       | 150.1      | 85.6       | 147.1      | 86.0       | 132.2      | 63.1       |
| Mean intake sports drinks (g/day)       | 7.7        | 7.7        | 4.4        | 4.4        | 8.2        | 8.2        | 8.4        | 8.4        | 8.2        | 8.2        |
| Relative standard error of estimate (%) | 0.9        | 0.9        | 1.3        | 1.3        | 1.9        | 1.9        | 2.0        | 2.0        | 1.5        | 1.5        |
| Lower 95% CI                            | 6.0        | 6.0        | 1.8        | 1.8        | 4.5        | 4.5        | 4.5        | 4.5        | 5.2        | 5.2        |
| Upper 95% CI                            | 9.5        | 9.5        | 7.1        | 7.1        | 12.0       | 12.0       | 12.3       | 12.3       | 11.2       | 11.2       |
| Mean intake energy drinks (g/day)       | 5.2        | 5.2        | 5.1        | 5.1        | 7.0        | 7.0        | 3.1        | 3.1        | 3.0        | 3.0        |
| Relative standard error of estimate (%) | 1.1        | 1.1        | 1.3        | 1.3        | 1.7        | 1.7        | 0.8        | 0.8        | 0.9        | 0.9        |
| Lower 95% CI                            | 3.0        | 3.0        | 2.4        | 2.4        | 3.5        | 3.5        | 1.5        | 1.5        | 1.2        | 1.2        |
| Upper 95% CI                            | 7.3        | 7.3        | 7.8        | 7.8        | 10.5       | 10.5       | 4.7        | 4.7        | 4.8        | 4.8        |
| Mean intake fruit drink (g/day)         | 51.3       | 46.2       | 39.2       | 25.1       | 46.7       | 31.0       | 30.9       | 28.5       | 38.3       | 32.4       |
| Relative standard error of estimate (%) | 6.9        | 6.3        | 8.1        | 3.3        | 7.0        | 3.6        | 4.3        | 4.7        | 4.8        | 3.8        |
| Lower 95% CI                            | 37.4       | 33.6       | 23.0       | 18.4       | 32.7       | 23.7       | 22.3       | 19.0       | 28.8       | 24.8       |
| Upper 95% CI                            | 65.1       | 58.7       | 55.4       | 31.8       | 60.8       | 38.3       | 39.5       | 38.0       | 47.8       | 40.1       |
| Mean intake cordial diluted (g/day)     | 54.5       | 20.2       | 55.7       | 32.3       | 38.7       | 29.7       | 31.5       | 16.5       | 26.1       | 15.4       |
| Relative standard error of estimate (%) | 8.3        | 4.3        | 9.7        | 5.0        | 7.8        | 6.4        | 7.3        | 3.1        | 5.1        | 3.4        |
| Lower 95% CI                            | 37.8       | 11.6       | 36.4       | 22.4       | 23.1       | 17.0       | 17.0       | 10.4       | 15.9       | 8.5        |
| Upper 95% CI                            | 71.2       | 28.7       | 75.0       | 42.3       | 54.3       | 42.5       | 46.1       | 22.6       | 36.3       | 22.3       |

|                                         | Population males |           |       |       |       |       |       |       |       |      |
|-----------------------------------------|------------------|-----------|-------|-------|-------|-------|-------|-------|-------|------|
| Consumption of SSB                      | Males 2-9        | 10-14 yrs | 15-19 | 20-24 | 25-34 | 35-44 | 45-54 | 55-64 | 65-74 | 75+  |
| Mean intake carbonated drinks (g/day)   | 41.9             | 143.3     | 293.6 | 201.7 | 219.2 | 131.9 | 125.9 | 85.9  | 44.7  | 35.7 |
| Relative standard error of estimate (%) | 5.1              | 16.7      | 31.9  | 24.2  | 22.1  | 10.0  | 12.2  | 10.2  | 6.6   | 7.1  |
| Lower 95% CI                            | 31.8             | 109.9     | 229.8 | 153.2 | 174.9 | 111.9 | 101.4 | 65.4  | 31.4  | 21.4 |
| Upper 95% CI                            | 52.1             | 176.8     | 357.4 | 250.1 | 263.5 | 152.0 | 150.4 | 106.3 | 58.0  | 49.9 |
|                                         |                  |           |       |       |       |       |       |       |       |      |
| Mean intake sports drinks (g/day)       | 12.0             | 12.0      | 12.0  | 12.0  | 12.0  | 12.0  | 12.0  | 12.0  | 12.0  | 12.0 |
| Relative standard error of estimate (%) | 1.4              | 1.4       | 1.4   | 1.4   | 1.4   | 1.4   | 1.4   | 1.4   | 1.4   | 1.4  |
| Lower 95% CI                            | 9.2              | 9.2       | 9.2   | 9.2   | 9.2   | 9.2   | 9.2   | 9.2   | 9.2   | 9.2  |
| Upper 95% CI                            | 14.8             | 14.8      | 14.8  | 14.8  | 14.8  | 14.8  | 14.8  | 14.8  | 14.8  | 14.8 |
|                                         |                  |           |       |       |       |       |       |       |       |      |
| Mean intake energy drinks (g/day)       | 7.3              | 7.3       | 7.3   | 7.3   | 7.3   | 7.3   | 7.3   | 7.3   | 7.3   | 7.3  |
| Relative standard error of estimate (%) | 1.0              | 1.0       | 1.0   | 1.0   | 1.0   | 1.0   | 1.0   | 1.0   | 1.0   | 1.0  |
| Lower 95% CI                            | 5.4              | 5.4       | 5.4   | 5.4   | 5.4   | 5.4   | 5.4   | 5.4   | 5.4   | 5.4  |
| Upper 95% CI                            | 9.2              | 9.2       | 9.2   | 9.2   | 9.2   | 9.2   | 9.2   | 9.2   | 9.2   | 9.2  |
|                                         |                  |           |       |       |       |       |       |       |       |      |
| Mean intake fruit drink (g/day)         | 59.9             | 56.2      | 47.0  | 91.6  | 48.8  | 42.7  | 20.6  | 25.3  | 19.2  | 19.9 |
| Relative standard error of estimate (%) | 8.9              | 13.5      | 10.4  | 22.7  | 8.1   | 7.7   | 3.3   | 5.2   | 3.9   | 4.6  |
| Lower 95% CI                            | 42.1             | 29.1      | 26.1  | 46.1  | 32.5  | 27.2  | 14.0  | 14.8  | 11.3  | 10.7 |
| Upper 95% CI                            | 77.7             | 83.3      | 67.9  | 137.0 | 65.1  | 58.1  | 27.2  | 35.8  | 27.0  | 29.0 |
|                                         |                  |           |       |       |       |       |       |       |       |      |
| Mean intake cordial diluted (g/day)     | 51.8             | 76.0      | 40.2  | 55.9  | 42.3  | 41.4  | 55.0  | 12.4  | 16.7  | 30.6 |
| Relative standard error of estimate (%) | 8.2              | 15.1      | 9.2   | 18.5  | 11.5  | 9.6   | 12.5  | 2.9   | 4.4   | 8.7  |
| Lower 95% CI                            | 35.4             | 45.7      | 21.8  | 18.9  | 19.3  | 22.2  | 30.1  | 6.6   | 8.0   | 13.3 |
| Upper 95% CI                            | 68.2             | 106.3     | 58.6  | 92.9  | 65.3  | 60.6  | 80.0  | 18.3  | 25.4  | 48.0 |

|                                         | Population females |           |       |       |       |       |       |       |       |      |
|-----------------------------------------|--------------------|-----------|-------|-------|-------|-------|-------|-------|-------|------|
| Consumption of SSB                      | Females 2-9        | 10-14 yrs | 15-19 | 20-24 | 25-34 | 35-44 | 45-54 | 55-64 | 65-74 | 75+  |
| Mean intake carbonated drinks (g/day)   | 45.6               | 120.3     | 155.0 | 118.0 | 91.4  | 74.2  | 67.5  | 38.4  | 34.6  | 29.2 |
| Relative standard error of estimate (%) | 5.4                | 14.0      | 18.8  | 14.8  | 8.1   | 8.7   | 10.4  | 5.1   | 6.3   | 4.9  |
| Lower 95% CI                            | 34.8               | 92.3      | 117.3 | 88.4  | 75.1  | 56.8  | 46.7  | 28.2  | 22.0  | 19.4 |
| Upper 95% CI                            | 56.3               | 148.2     | 192.7 | 147.6 | 107.7 | 91.6  | 88.3  | 48.5  | 47.1  | 38.9 |
| Mean intake sports drinks (g/day)       | 3.4                | 3.4       | 3.4   | 3.4   | 3.4   | 3.4   | 3.4   | 3.4   | 3.4   | 3.4  |
| Relative standard error of estimate (%) | 0.7                | 0.7       | 0.7   | 0.7   | 0.7   | 0.7   | 0.7   | 0.7   | 0.7   | 0.7  |
| Lower 95% CI                            | 1.9                | 1.9       | 1.9   | 1.9   | 1.9   | 1.9   | 1.9   | 1.9   | 1.9   | 1.9  |
| Upper 95% CI                            | 4.9                | 4.9       | 4.9   | 4.9   | 4.9   | 4.9   | 4.9   | 4.9   | 4.9   | 4.9  |
| Mean intake energy drinks (g/day)       | 2.0                | 2.0       | 2.0   | 2.0   | 2.0   | 2.0   | 2.0   | 2.0   | 2.0   | 2.0  |
| Relative standard error of estimate (%) | 0.4                | 0.4       | 0.4   | 0.4   | 0.4   | 0.4   | 0.4   | 0.4   | 0.4   | 0.4  |
| Lower 95% CI                            | 1.1                | 1.1       | 1.1   | 1.1   | 1.1   | 1.1   | 1.1   | 1.1   | 1.1   | 1.1  |
| Upper 95% CI                            | 2.8                | 2.8       | 2.8   | 2.8   | 2.8   | 2.8   | 2.8   | 2.8   | 2.8   | 2.8  |
| Mean intake fruit drink (g/day)         | 59.3               | 57.6      | 44.2  | 53.8  | 36.6  | 18.6  | 11.1  | 22.4  | 23.8  | 30.4 |
| Relative standard error of estimate (%) | 6.9                | 11.0      | 7.9   | 11.0  | 4.8   | 3.4   | 2.4   | 5.4   | 4.2   | 11.2 |
| Lower 95% CI                            | 45.5               | 35.6      | 28.3  | 31.7  | 27.0  | 11.8  | 6.3   | 11.6  | 15.3  | 7.9  |
| Upper 95% CI                            | 73.0               | 79.7      | 60.0  | 75.9  | 46.2  | 25.5  | 15.9  | 33.2  | 32.2  | 52.9 |
| Mean intake cordial diluted (g/day)     | 36.9               | 34.0      | 31.9  | 17.4  | 29.8  | 21.8  | 13.7  | 15.9  | 14.3  | 5.2  |
| Relative standard error of estimate (%) | 6.8                | 8.4       | 11.8  | 4.9   | 5.7   | 4.0   | 2.8   | 4.2   | 4.1   | 1.6  |
| Lower 95% CI                            | 23.4               | 17.2      | 8.3   | 7.5   | 18.3  | 13.9  | 8.1   | 7.5   | 6.0   | 2.1  |
| Upper 95% CI                            | 50.4               | 50.7      | 55.4  | 27.2  | 41.3  | 29.7  | 19.3  | 24.3  | 22.5  | 8.4  |
