# Supplementary material for: Modelled health benefits of a sugar-sweetened beverage tax across different socioeconomic groups in Australia: A cost-effectiveness and equity analysis
Source: PubMed Central journal article supplement (PMC5486958; doi:10.1371/journal.pmed.1002326), 2017-06-27
Supplement: pmed.1002326.s007.pdf [file pmed.1002326.s007.pdf]

**S2 Table. Impact of a 20% tax on demand for SSBs by SEIFA quintile and total population**

| % change demanded per capita | Quintile 1 (lowest) | Quintile 2 | Quintile 3 | Quintile 4 | Quintile 5 (highest) | All households |
|------------------------------|---------------------|------------|------------|------------|----------------------|----------------|
| Soft drinks (pop, soda) *    | -15.05              | -14.84     | -14.92     | -13.87     | -13.10               | -11.52         |
| Cordial (concentrate)        | -45.55              | -40.86     | -35.63     | -32.58     | -29.98               | -33.23         |
| Fruit drink                  | -3.08               | -14.99     | -36.61     | -19.36     | -11.82               | -25.50         |

Notes: All non-zero effects significant at 10% level.

\*Soft drinks include standard soft drinks, sports and energy drinks, flavoured bottled water
