# Supplementary material for: Modelled health benefits of a sugar-sweetened beverage tax across different socioeconomic groups in Australia: A cost-effectiveness and equity analysis
Source: PubMed Central journal article supplement (PMC5486958; doi:10.1371/journal.pmed.1002326), 2017-06-27
Supplement: pmed.1002326.s008.pdf [file pmed.1002326.s008.pdf]

**S3 Table. Estimating the cost of sugar-sweetened beverage tax legislation**

| <b>Variable</b>                                                                                           | <b>Value</b> | <b>Source or Method of calculation</b>                                                                                                                                                                                     |
|-----------------------------------------------------------------------------------------------------------|--------------|----------------------------------------------------------------------------------------------------------------------------------------------------------------------------------------------------------------------------|
| Senate annual expenses                                                                                    | 23,596,000   | Average of annual expenses 2010-2015 Department of Senate Annual Reports[1]                                                                                                                                                |
| House of Representatives annual expenses                                                                  | 25,800,000   | Average of annual expenses 2010-2015. Department of House of Representatives Annual Reports[2]                                                                                                                             |
| Office of Parliamentary Counsel - legislation drafting and publication                                    | 15,690,000   | Office of Parliamentary Counsel Budgets[3]                                                                                                                                                                                 |
| Annual parliamentarians' salaries                                                                         | 3,363,000    | Number of hours spent on legislation/total working hours in a year = 18% times total parliamentarians salaries from Senate budget statements - resource statements Third Party Drawdowns on behalf of other departments[4] |
| Total annual cost of running the parliamentary service (PS)                                               | 65,086,000   | Sum of variables above                                                                                                                                                                                                     |
| Total annual cost of policy advice related to new laws provided by government agencies to parliament (PA) | 39,443,000   | \$59,273,246 from Wilson et al [5]<br>Converted to \$AU 2010[6]                                                                                                                                                            |
| No. bills passed                                                                                          | 170          | Average of number of bills passed by Senate [7]                                                                                                                                                                            |
| Regulatory impact statement (RIS)                                                                         | \$440,000    | Australian Government cost of RIS[8]                                                                                                                                                                                       |
| Average cost of new legislation                                                                           | \$1,090,000  | Total costs= PS+PA+RIS/no. bills                                                                                                                                                                                           |

## References

1. Parliament of Australia. Department of Senate Annual Reports Canberra, Australia: 2015
2. Parliament of Australia. Department of House of Representatives Annual Reports Canberra, Australia: 2015
3. Australian Government Attorney-General's Department. Budgets Canberra, Australia: 2015
4. Parliament of Australia. Portfolio budget statements Canberra, Australia 2015. Available from:  
[http://www.aph.gov.au/About\\_Parliament/Parliamentary\\_Departments/Department\\_of\\_the\\_Senate/Portfolio\\_Budget\\_Statements](http://www.aph.gov.au/About_Parliament/Parliamentary_Departments/Department_of_the_Senate/Portfolio_Budget_Statements).
5. Wilson N, Nghiem N, Foster R, et al. Estimating the cost of new public health legislation. *Bulletin of the World Health Organization*. 2012;90:477-556.
6. Organisation for Economic Co-operation and Development. PPPs and exchange rates 2016 [Accessed: 2016 8 June]. Available from:  
[http://stats.oecd.org/Index.aspx?datasetcode=SNA\\_TABLE4](http://stats.oecd.org/Index.aspx?datasetcode=SNA_TABLE4).
7. Parliament of Australia. Time spent on consideration of legislation - 43rd Parliament Canberra, Australia 2013 [Accessed: 2016 8 June]. Available from:  
[http://www.aph.gov.au/Parliamentary\\_Business/Statistics/Senate\\_StatsNet/legislation/timespent/2013](http://www.aph.gov.au/Parliamentary_Business/Statistics/Senate_StatsNet/legislation/timespent/2013).
8. Australian Government Productivity Commission. Regulatory Impact Analysis: Benchmarking Productivity Commission Research Report. Commonwealth of Australia, 2012
